# Supplementary material for: Avelumab or talazoparib in combination with binimetinib in metastatic pancreatic ductal adenocarcinoma: dose-finding results from phase Ib of the JAVELIN PARP MEKi trial
Source: PubMed Central journal article supplement — ESMO Open. 2023 Jun 26;8(4):101584. doi: 10.1016/j.esmoop.2023.101584 (PMC10515283; doi:10.1016/j.esmoop.2023.101584), 2023-06-26

**Binimetinib 45 mg BID 7 days on/  
7 days off, talazoparib 0.75 mg QD**

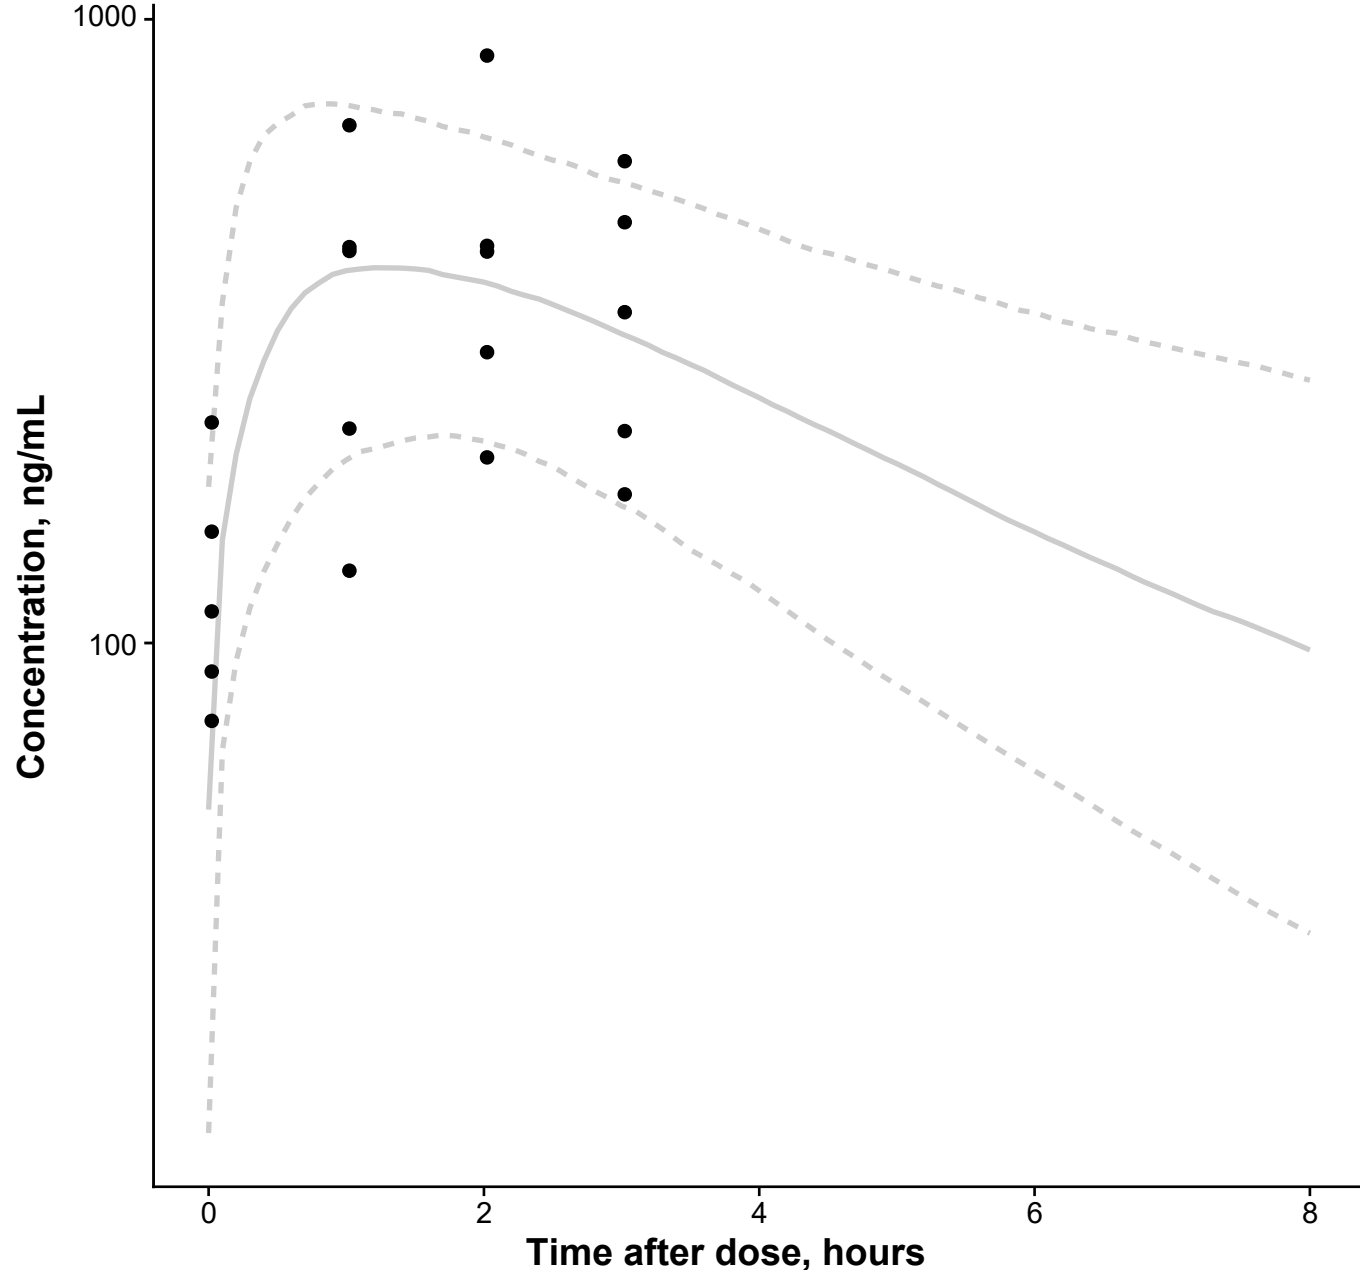

**Binimetinib 30 mg BID 7 days on/  
7 days off, talazoparib 0.75 mg QD**

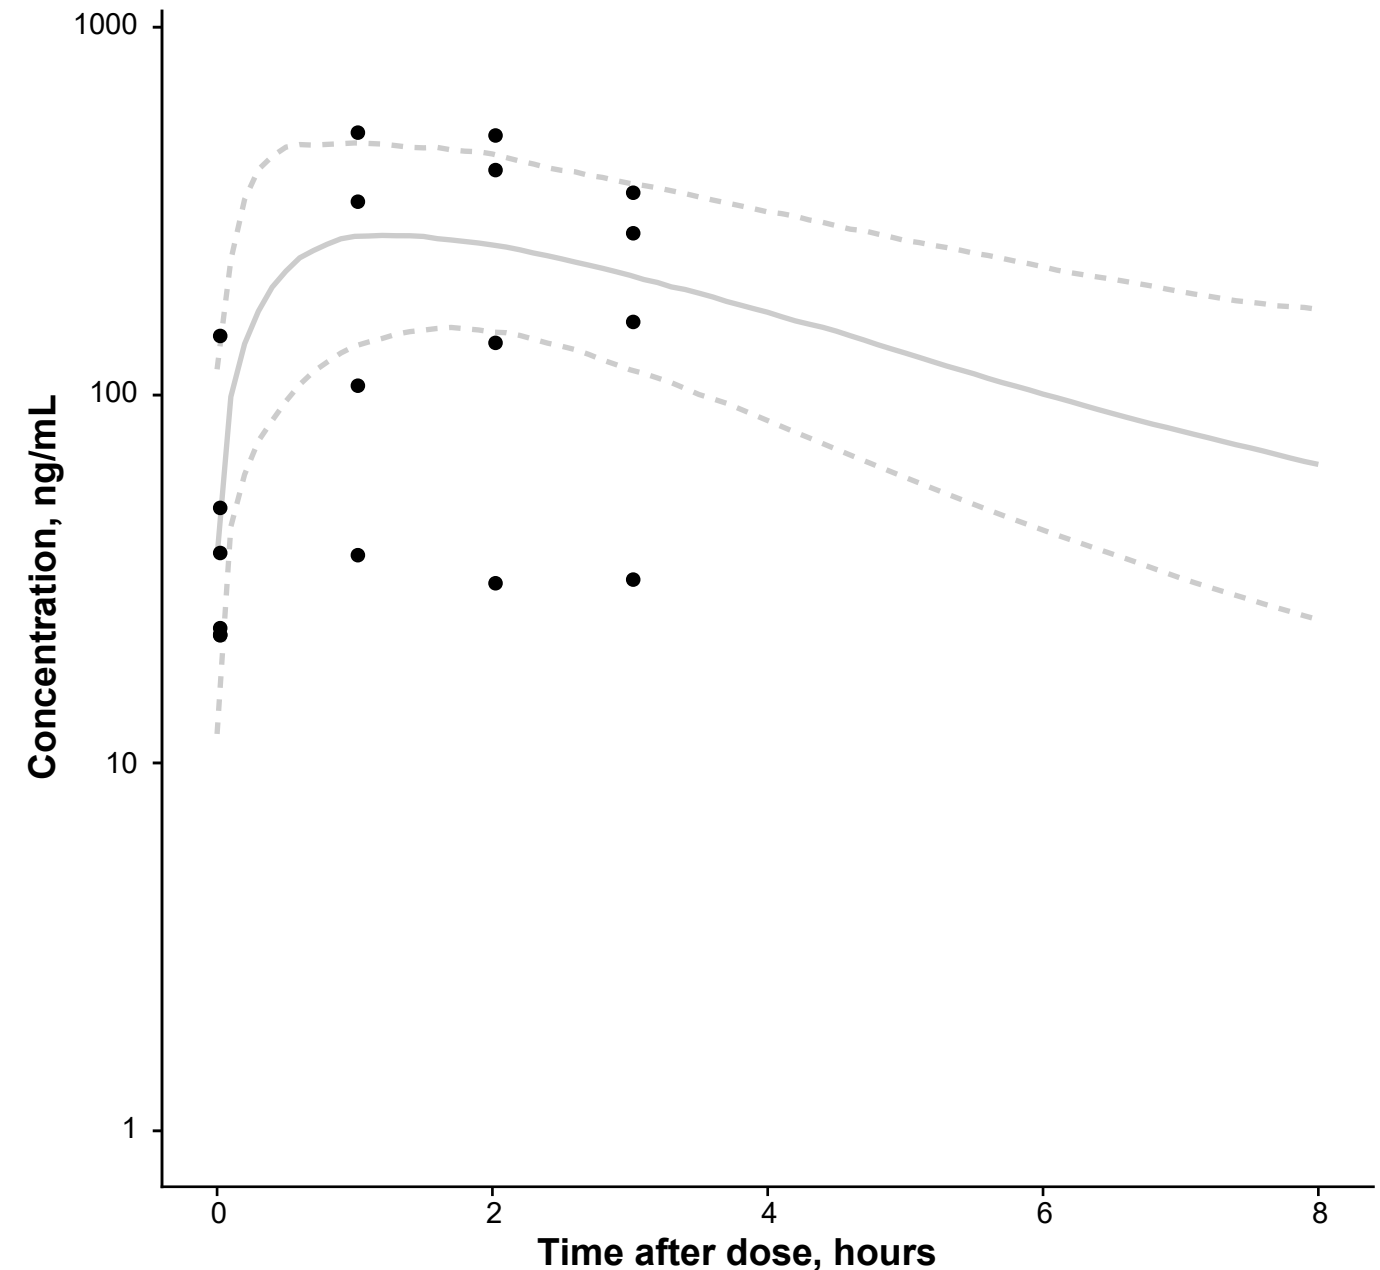

Supplement: mmc5.pdf [file mmc5.pdf]
