# Supplementary figures and images for: Avelumab or talazoparib in combination with binimetinib in metastatic pancreatic ductal adenocarcinoma: dose-finding results from phase Ib of the JAVELIN PARP MEKi trial
Source: PubMed Central journal article supplement — ESMO Open. 2023 Jun 26;8(4):101584. doi: 10.1016/j.esmoop.2023.101584 (PMC10515283; doi:10.1016/j.esmoop.2023.101584), 2023-06-26

**Avelumab C<sub>min</sub> following a single dose**

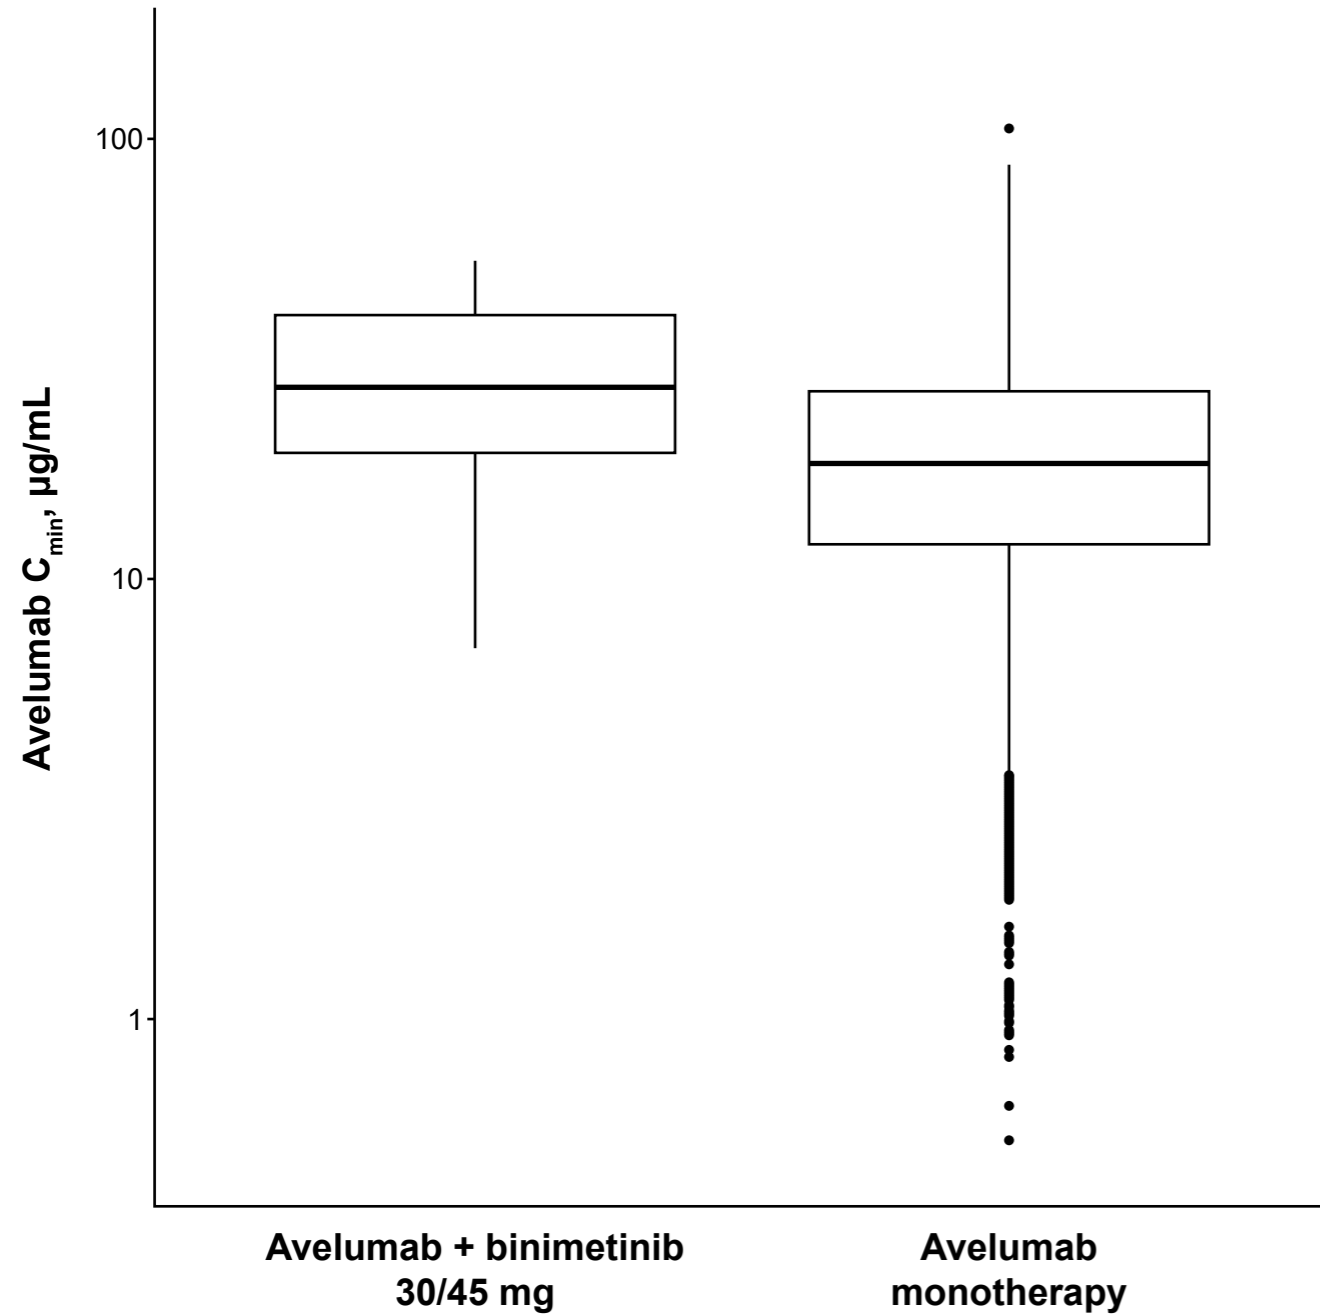

**Avelumab C<sub>max</sub> following a single dose**

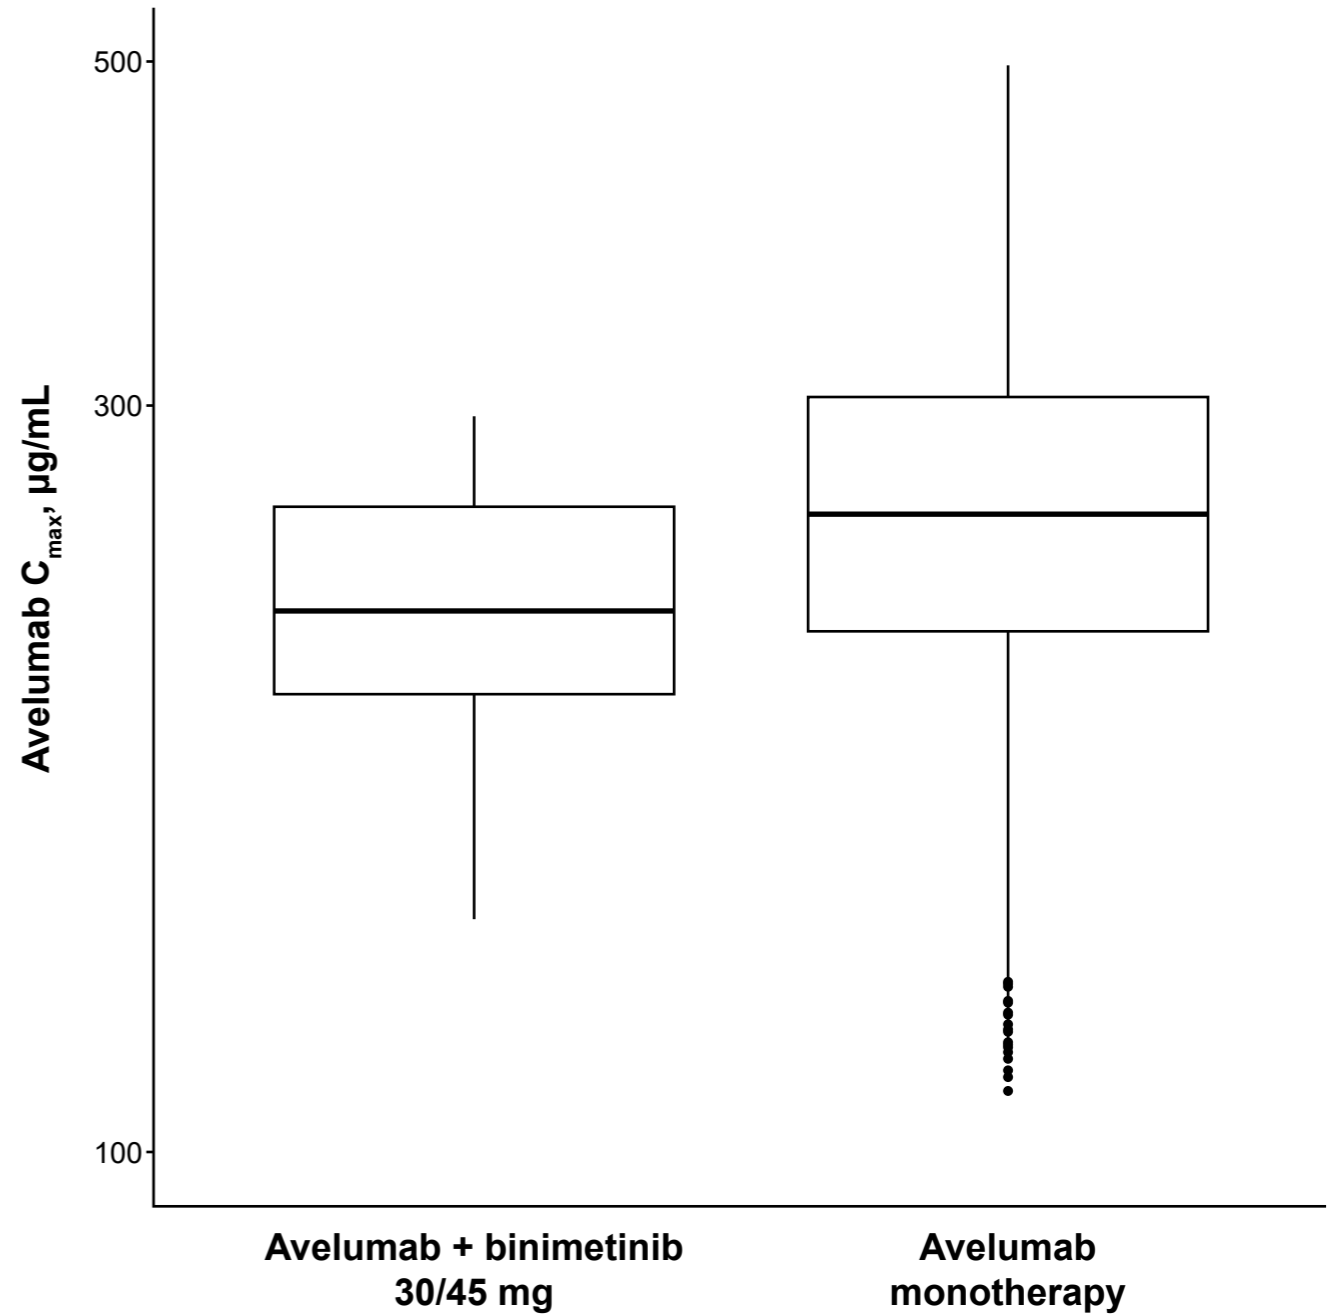

Supplement: mmc2.pdf [file mmc2.pdf]

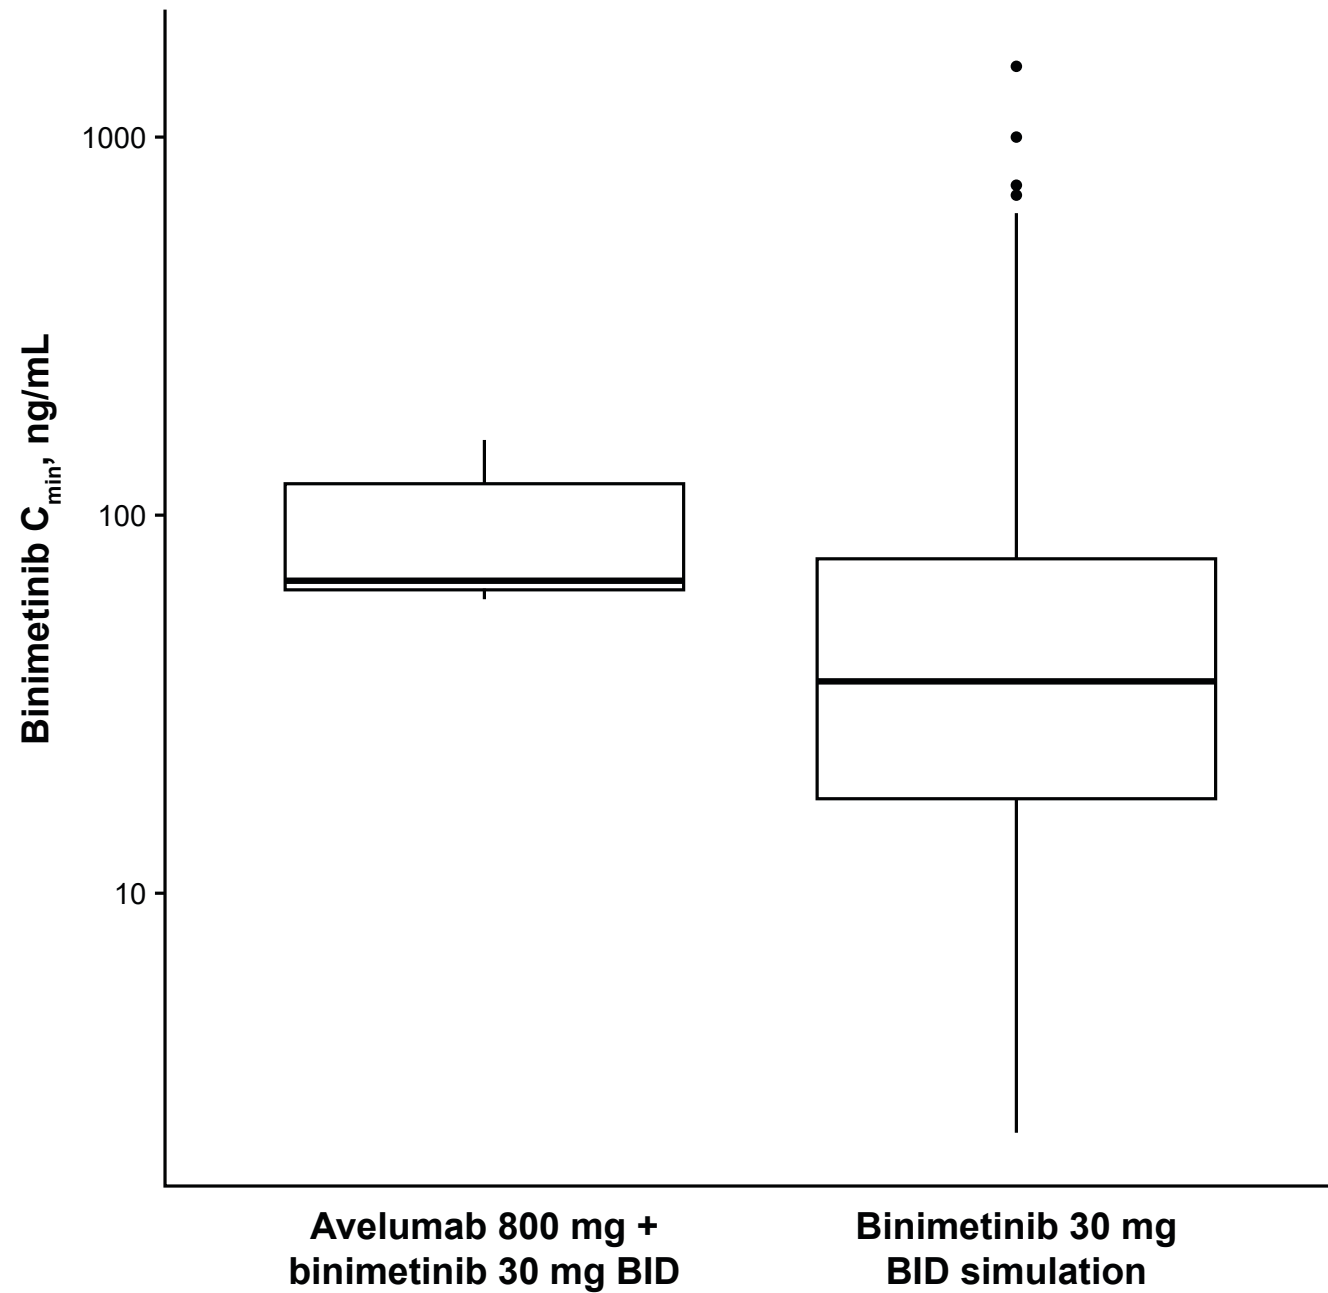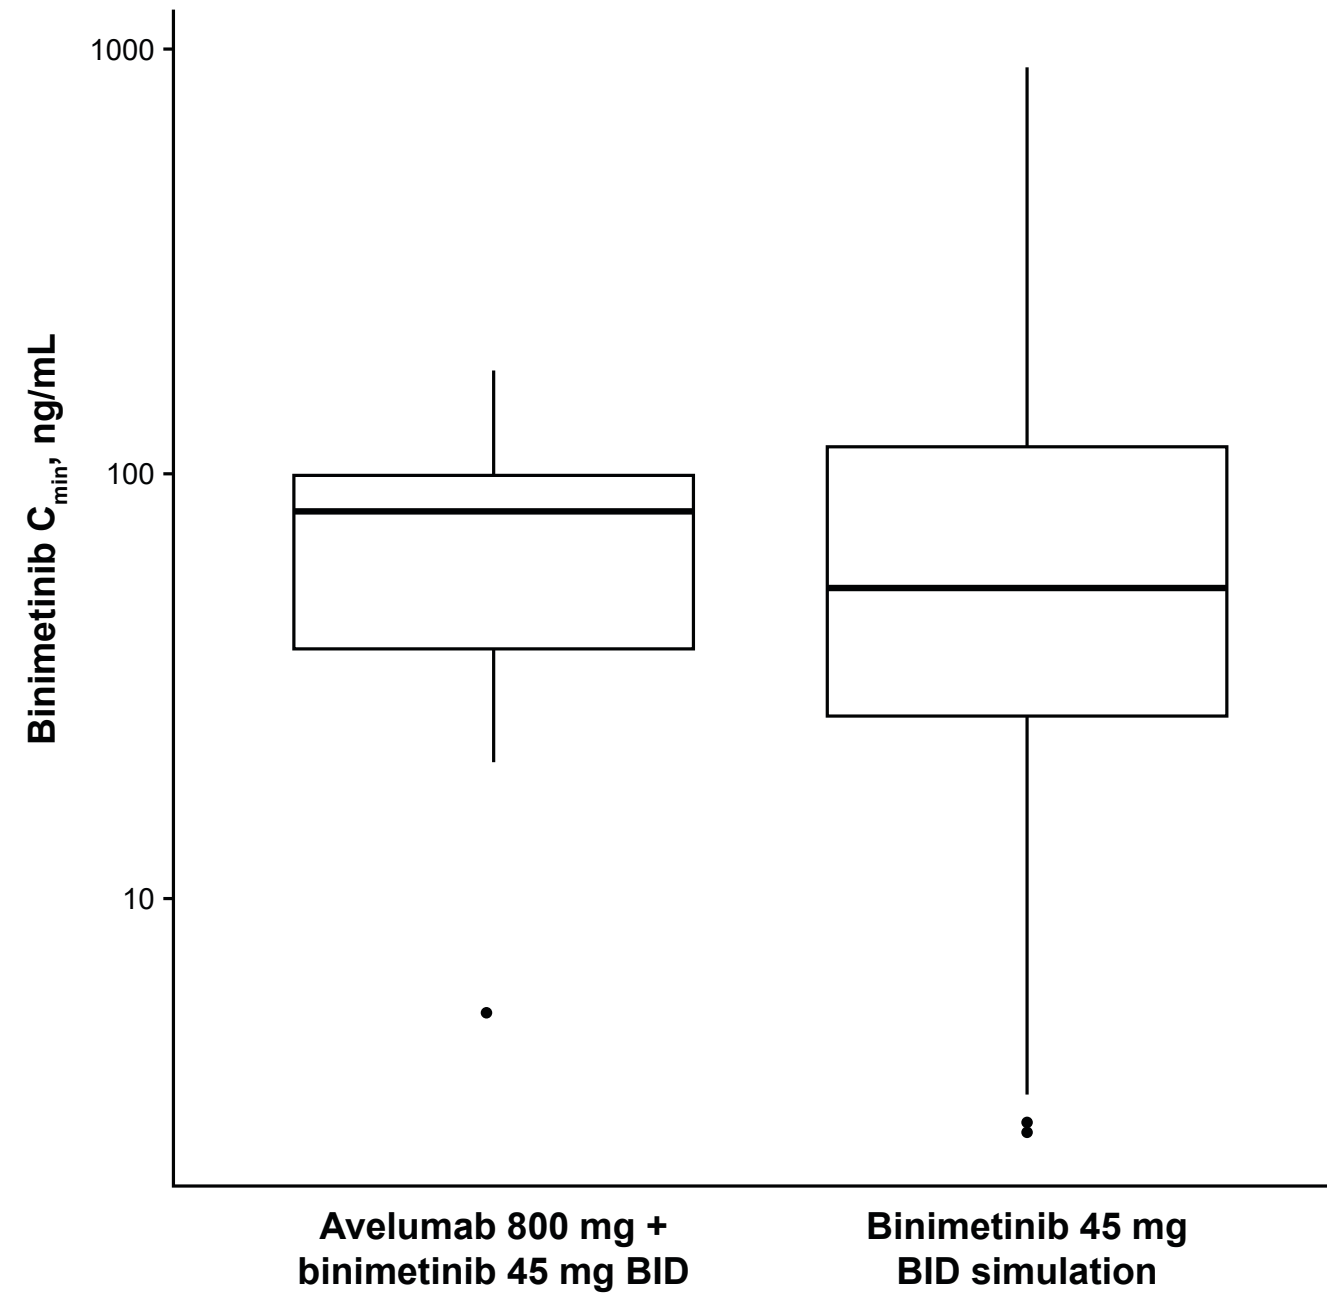

Supplement: mmc3.pdf [file mmc3.pdf]

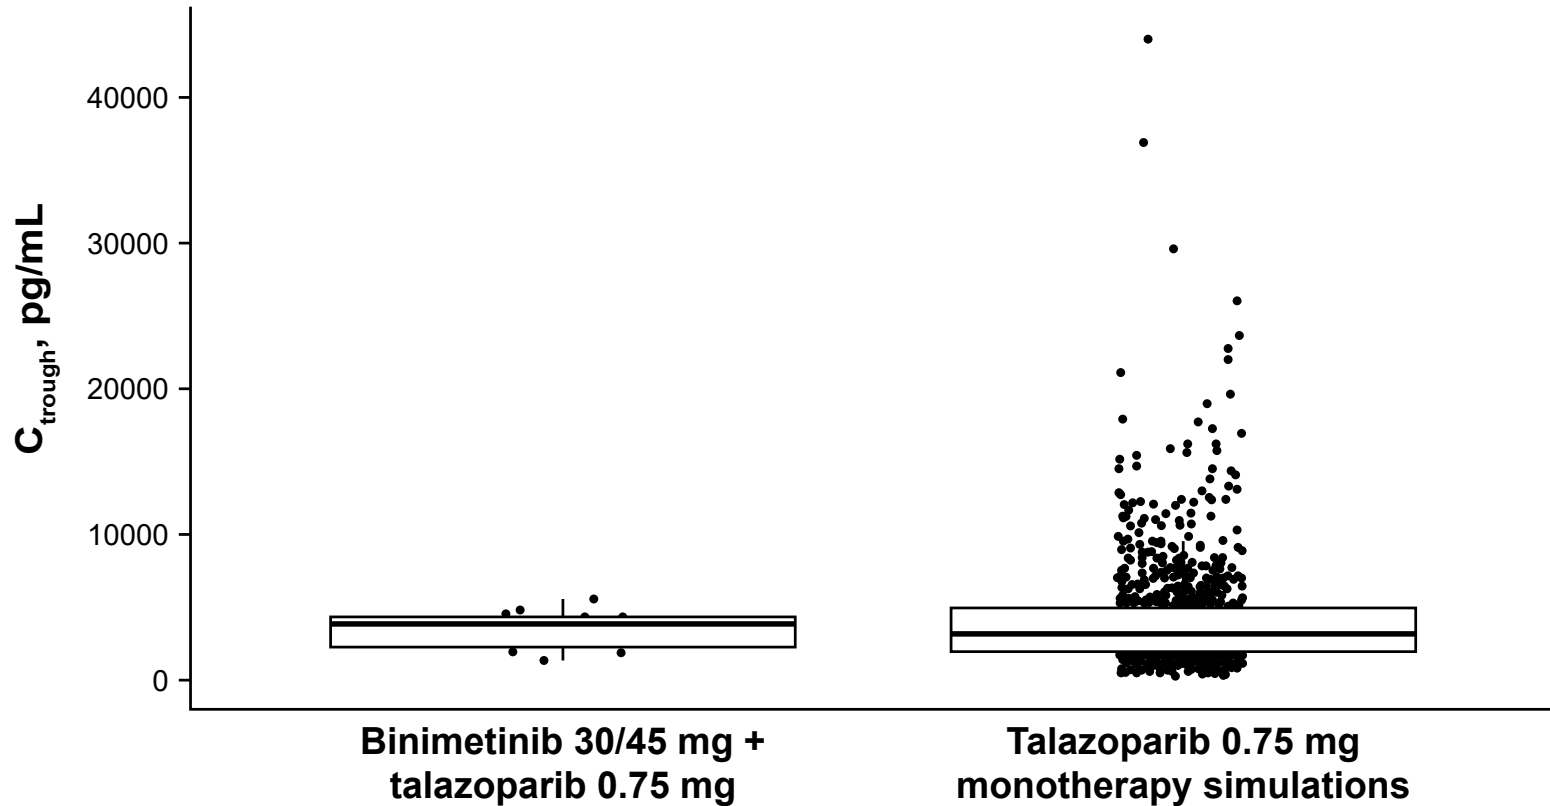

Supplement: mmc4.pdf [file mmc4.pdf]
